# Supplementary material
Source: Royal Society of Chemistry journal article supplement (doi:10.1039/d5tb02697k)
Supplement: d5tb02697k1.pdf [file d5tb02697k1.pdf]

## **A Low-Cost Titanium Suboxide pH Sensor with Competitive Operational Lifetime Assessed with Electrochemical Impedance Spectroscopy**

Kyriakos Almpnidis<sup>a</sup>, Apostolos Panagiotopoulos<sup>a</sup>, George Kakavelakis<sup>b</sup>, Leslie Askew<sup>a</sup>, Xiaoqian Pu<sup>a</sup>, Dimitar I. Kutsarov<sup>a</sup>, Steven J. Hinder<sup>c</sup>, S. Ravi P. Silva<sup>a,d</sup> and Vlad Stolojan<sup>a,d,\*</sup>

<sup>a</sup> Advanced Technology Institute, School of Computer Science and Electronic Engineering, University of Surrey, Guildford, UK, GU2 7XH

<sup>b</sup> Department of Electronic Engineering, School of Engineering, Hellenic Mediterranean University, Romanou 3, Chalepa, Chania, Crete, Greece, 731 33

<sup>c</sup> Surface Analysis Laboratory, School of Mechanical Engineering Sciences, University of Surrey, Guildford, UK, GU2 7XH

<sup>d</sup> Institute for Sustainability, University of Surrey, Guildford, UK, GU2 7XH

\* Corresponding author: [v.stolojan@surrey.ac.uk](mailto:v.stolojan@surrey.ac.uk)

Keywords: pH sensors, Electrochemical Impedance Spectroscopy, Smart Bandages, Wound Monitoring, Transition Metal Oxides

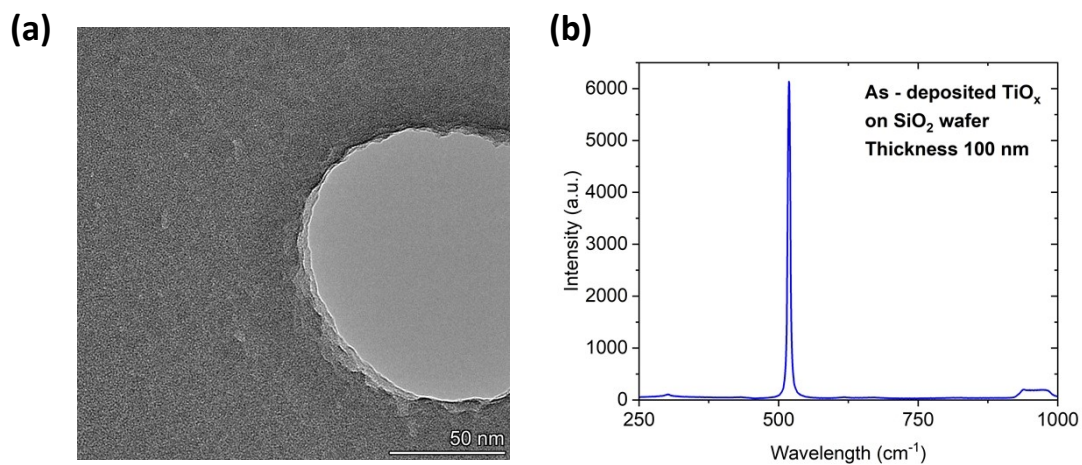

Figure S1. (a) TEM image of the amorphous  $\text{TiO}_x$  film. The hole on the right is due to the TEM grid for resolution purposes. (b) Raman Spectra of a 100 nm  $\text{TiO}_x$  film on a Silicon/silicon dioxide wafer. Since the  $\text{TiO}_x$  films are amorphous, the only peaks that can be observed are those from the Silicon/silicon dioxide wafer.

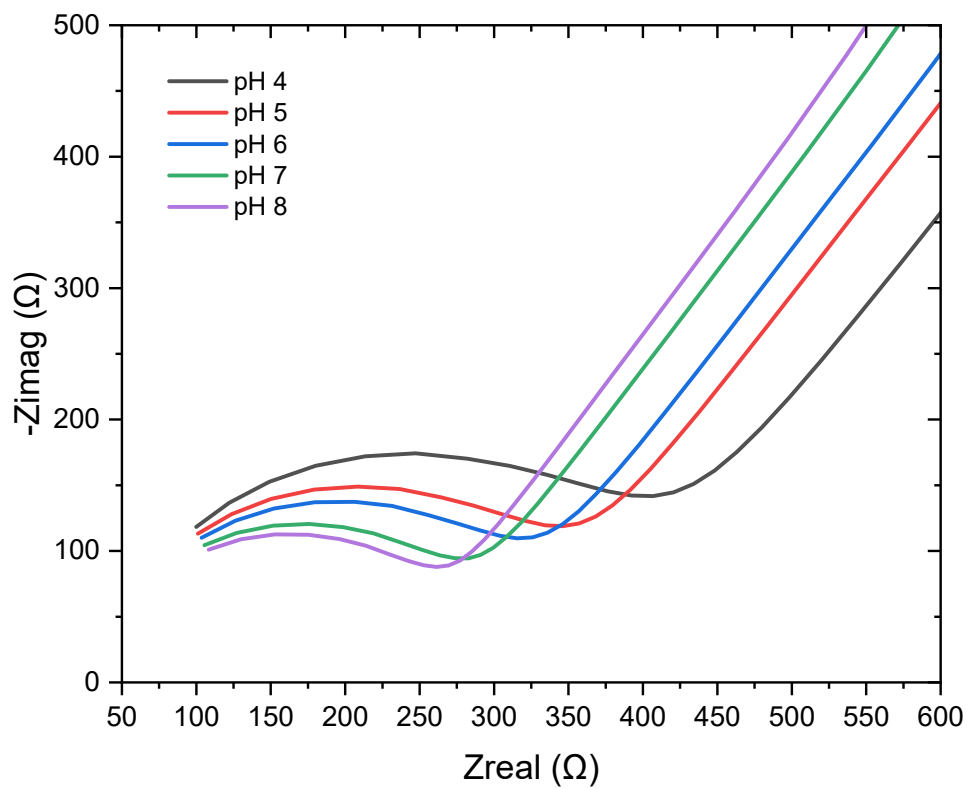

Figure S2. Nyquist plots from the  $\text{TiO}_x$  sensor in the pH range 4-8. The semicircle evolution is related to interfacial capacitive phenomena.

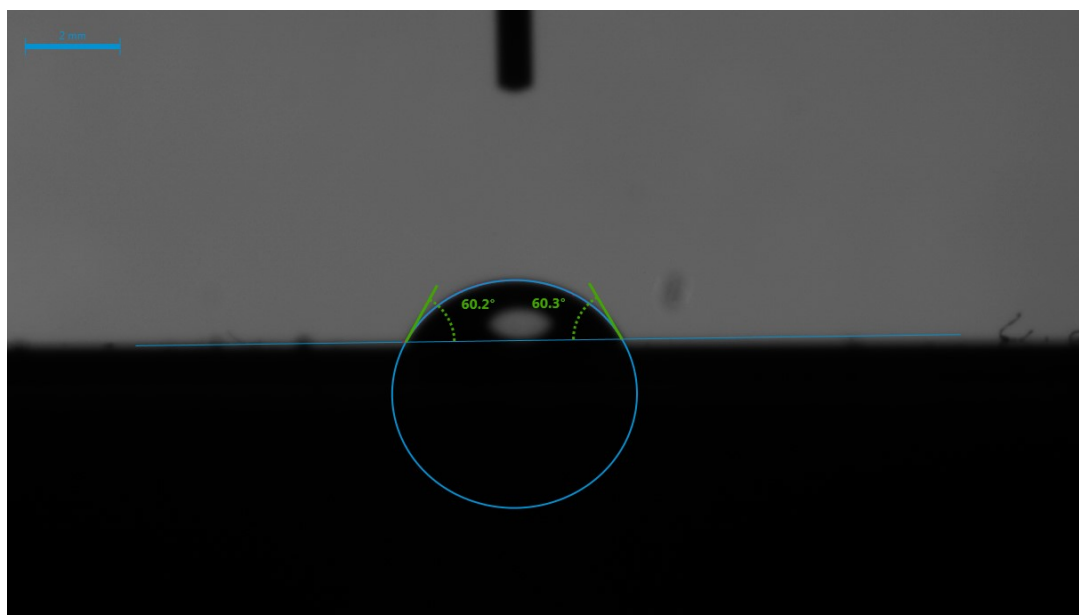

Figure S3. Contact angle measurement for the  $\text{TiO}_x$  films. The Contact angle of 60.2 degrees indicates the hydrophilicity of the  $\text{TiO}_x$  film, which can be correlated with the presence of -OH groups on the surface, which are correlated with the  $\text{TiO}_x$  pH sensing mechanism.

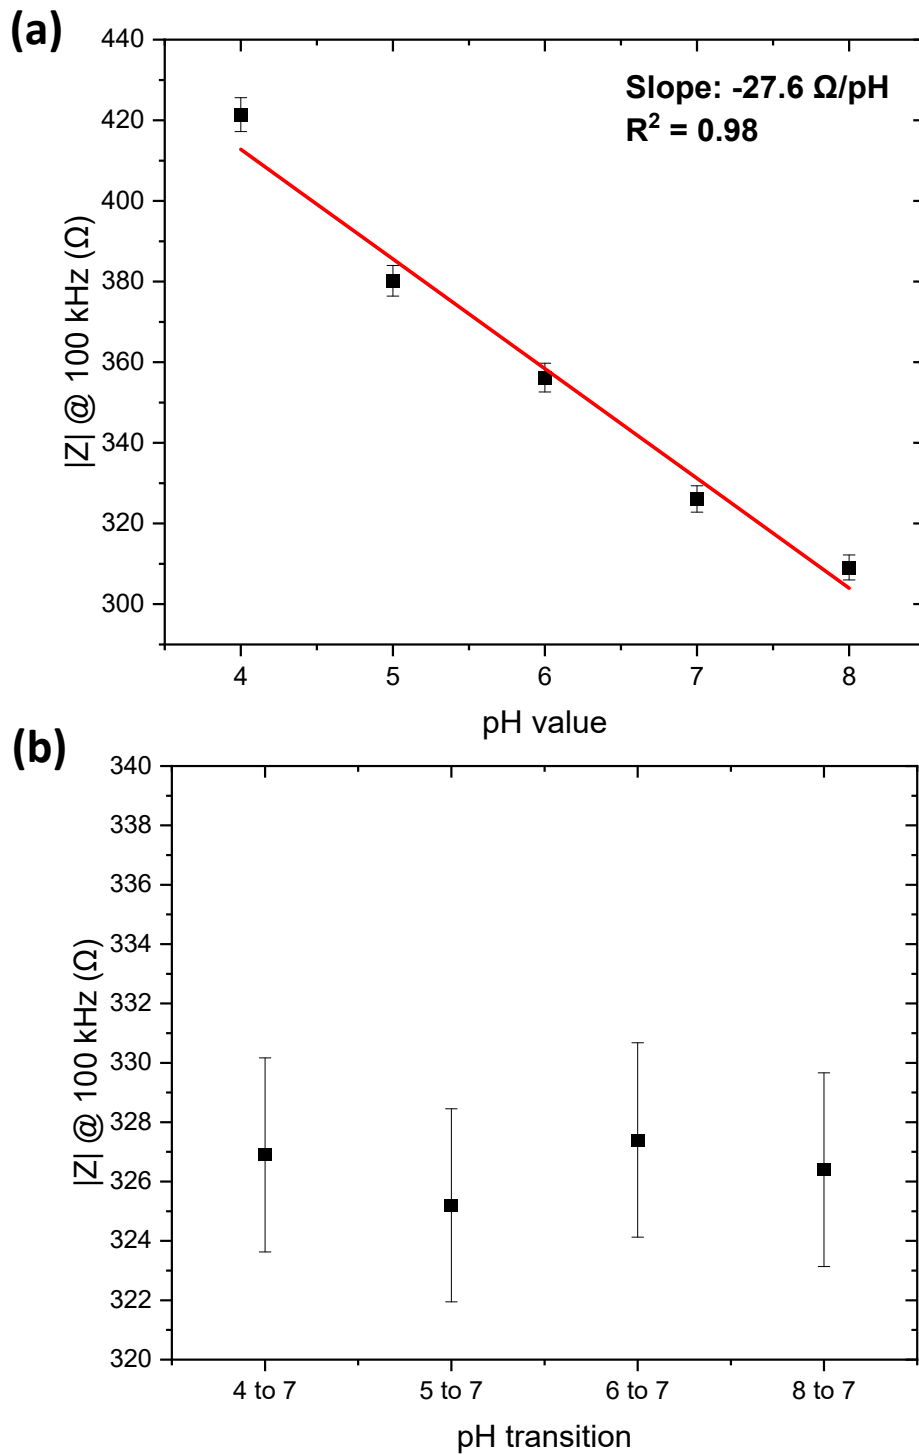

Figure S4. The reversibility of the  $\text{TiO}_x$  sensor by measuring the impedance at pH 7 after every pH value. (a) The sensitivity in the pH range 4-8 remains constant. (b) pH 7 impedance measured after every pH value. It remained constant which proves the  $\text{TiO}_x$ 's sensor reversibility. Each error bar is produced by EIS measurements of seven devices.



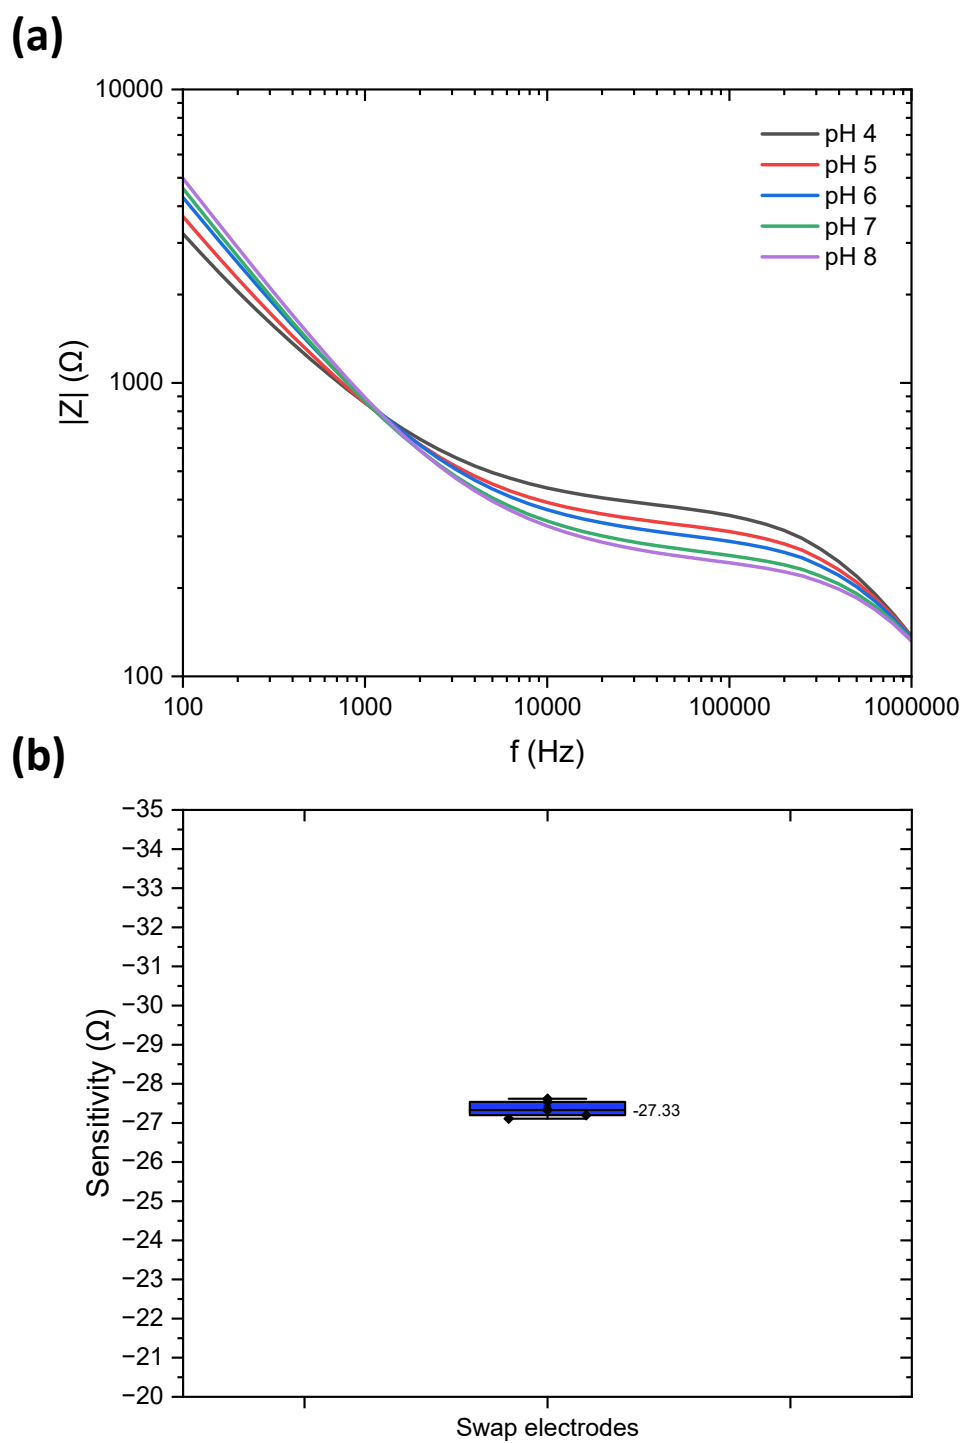

Figure S5. The EIS results for the  $\text{TiO}_x$  sensors after swapping electrodes. (a) Bode plots responses from the pH4-8 buffer solutions and (b) the sensitivity of the  $\text{TiO}_x$  sensors. The sensitivity maintenance is translated as the sensing mechanism happens on the  $\text{TiO}_x$  surface.

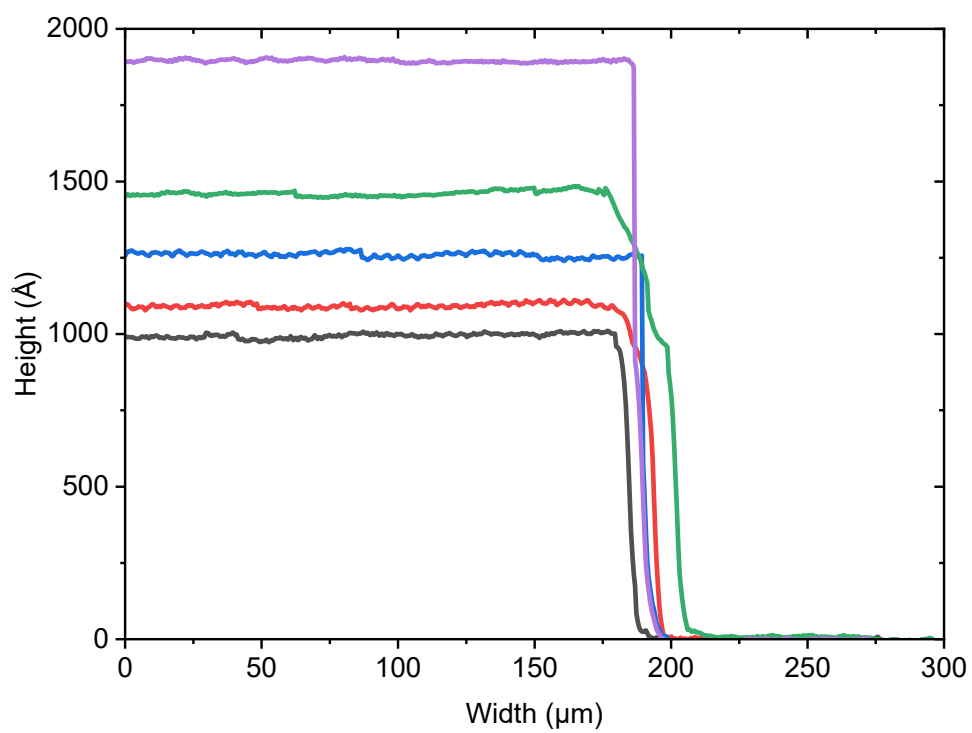

Figure S6. The thicknesses for the Ag electrode (grey line) and the  $\text{TiO}_x$  films on top of the Ag electrode. The  $\text{TiO}_x$  thicknesses are 10, 25, 45 and 90 nm, respectively.

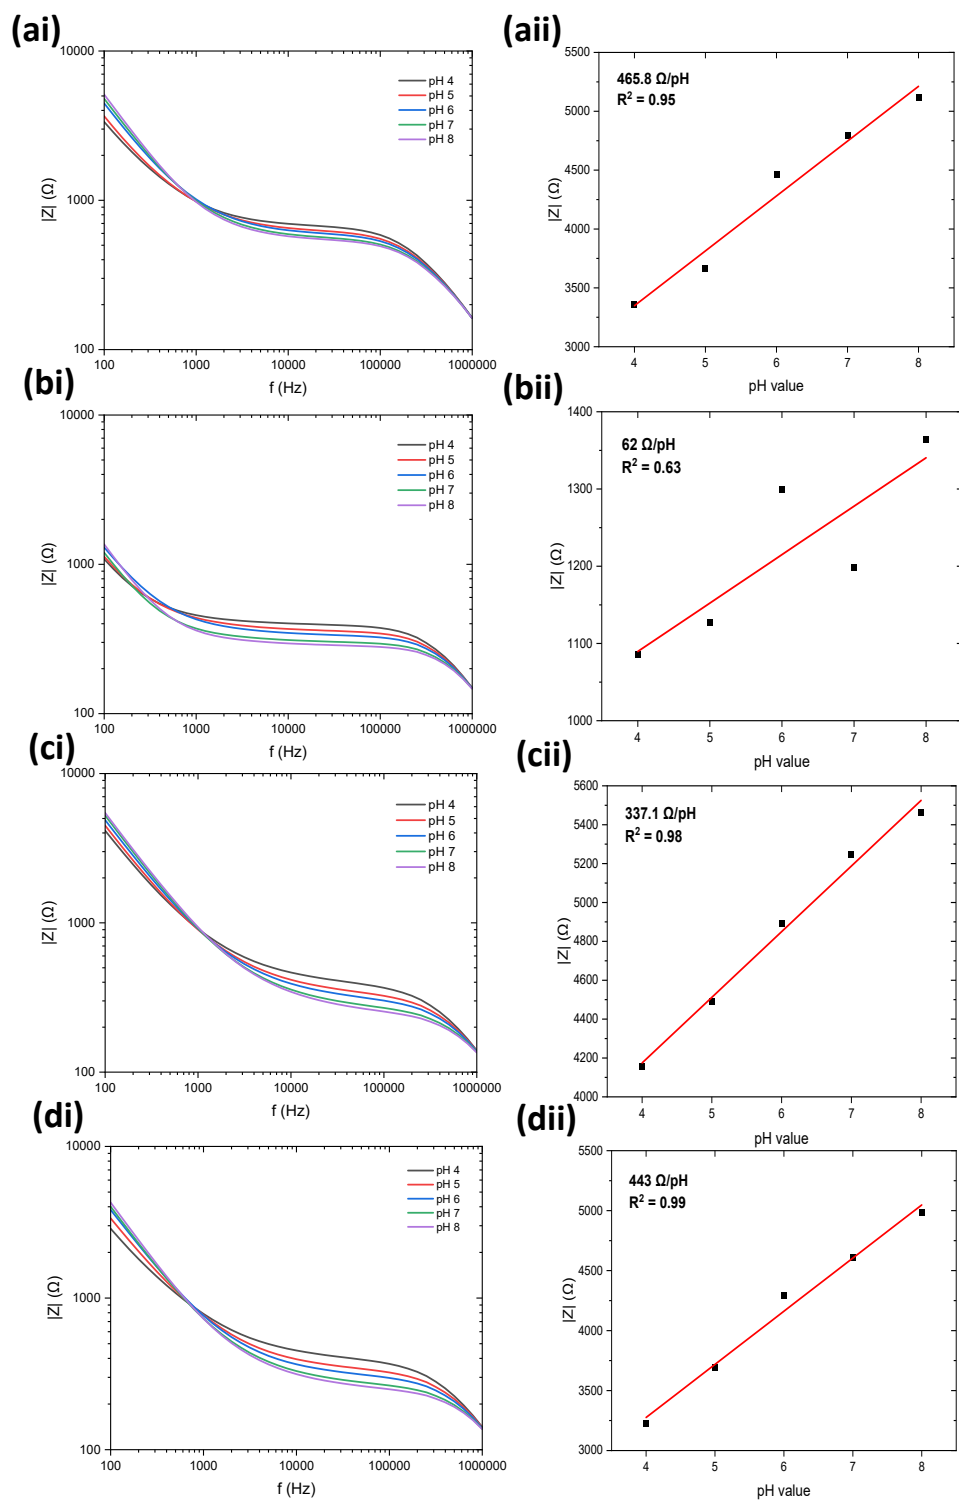

Figure S7. The impedance response for the different TiO<sub>x</sub> thicknesses. (ai-di) Bode plots and (aii-dii) Impedance at 100 Hz for every pH in the range 4-8. There is no constant slope (sensitivity) across different TiO<sub>x</sub> thicknesses. The a, b, c and d notify the 10, 25, 40 and 90 nm TiO<sub>x</sub> thickness respectively.

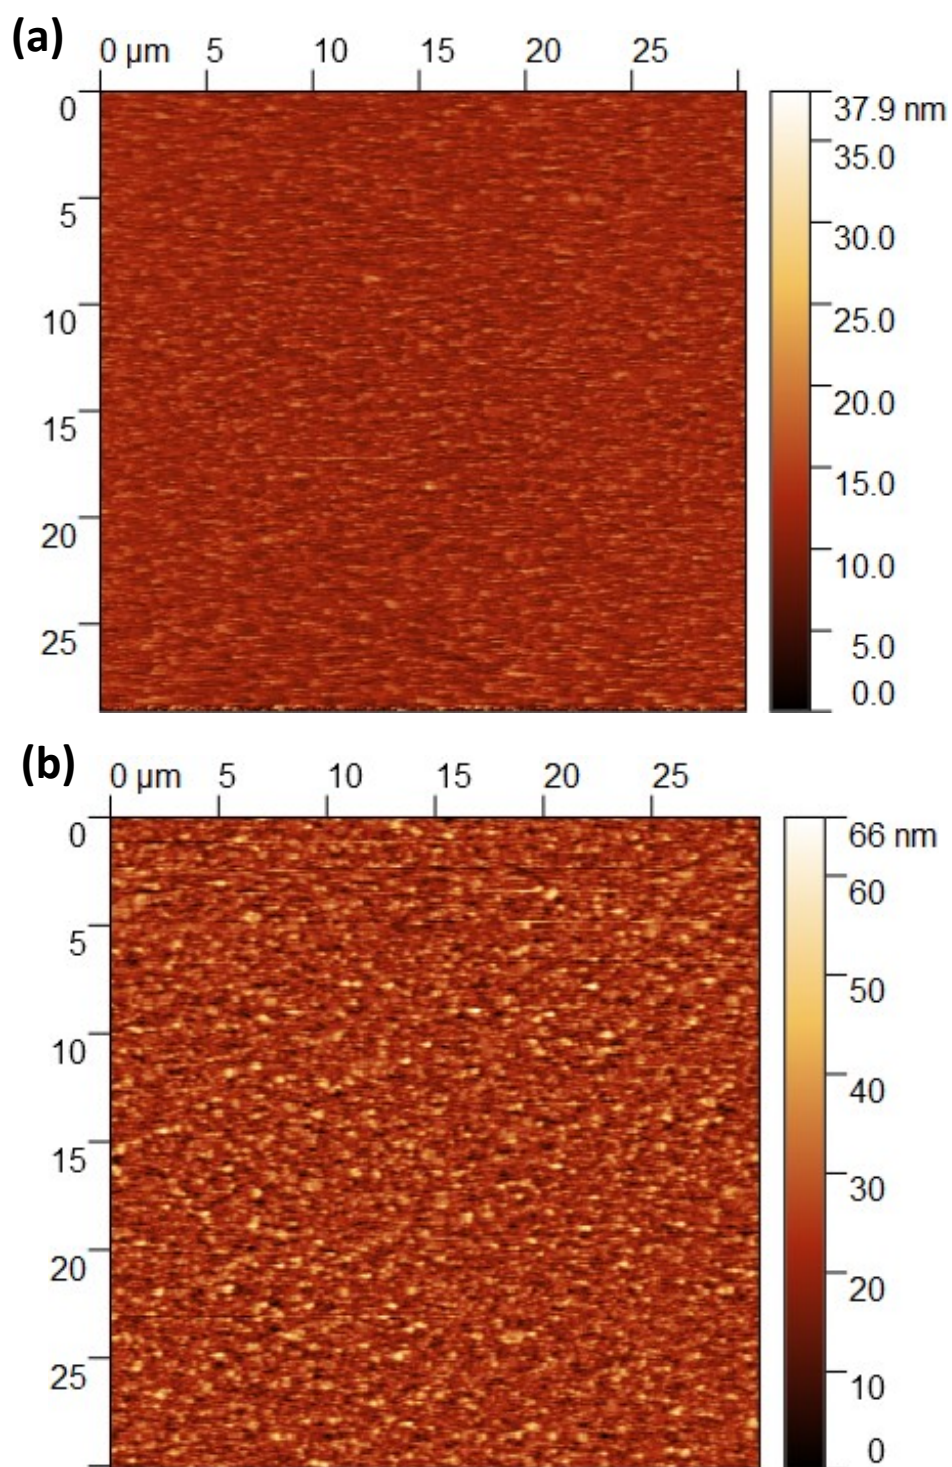

Figure S8. AFM measurements for the Ag electrode. (a) Pristine Ag electrode, (b) after thermal annealing. The roughness increased but there is no islands' formation.

## Statistical Significance Analysis

First, the statistical data from pH EIS values at 100 kHz (Figures 3b and d) have been presented below.

TiO<sub>x</sub>

| pH transition | h-value | p-value                  |
|---------------|---------|--------------------------|
| 4 to 5        | 1       | 2.14 * 10 <sup>-13</sup> |
| 5 to 6        | 1       | 6.20 * 10 <sup>-10</sup> |
| 6 to 7        | 1       | 1.62 * 10 <sup>-13</sup> |
| 7 to 8        | 1       | 1.89 * 10 <sup>-8</sup>  |

PANI

| pH transition | h-value | p-value                  |
|---------------|---------|--------------------------|
| 4 to 5        | 1       | 3.51 * 10 <sup>-9</sup>  |
| 5 to 6        | 1       | 1.05 * 10 <sup>-7</sup>  |
| 6 to 7        | 1       | 1.59 * 10 <sup>-11</sup> |
| 7 to 8        | 1       | 3.22 * 10 <sup>-11</sup> |

Testing pH sensors with different TiO<sub>x</sub> thicknesses, from pH 4 to 8 (Figure 5a)

| Comparison                 | h-value | p-value |
|----------------------------|---------|---------|
| Thickness 10 nm with 25 nm | 0       | 0.23    |
| Thickness 10 nm with 40 nm | 0       | 0.127   |
| Thickness 10 nm with 90 nm | 0       | 0.77    |

Testing pH sensors with different TiO<sub>x</sub> thicknesses, from pH 8 to 4 (Figure 5b)

| Comparison                 | h-value | p-value |
|----------------------------|---------|---------|
| Thickness 10 nm with 25 nm | 0       | 0.07    |
| Thickness 10 nm with 40 nm | 0       | 0.20    |
| Thickness 10 nm with 90 nm | 0       | 0.16    |

| Comparison                            | Figure | Material         | h-value | p-value                  |
|---------------------------------------|--------|------------------|---------|--------------------------|
| Dilution – Before/After               | 6a     | TiO <sub>x</sub> | 0       | 0.3906                   |
| Annealing – Fresh/After               | 6b     | TiO <sub>x</sub> | 1       | 1.22 * 10 <sup>-4</sup>  |
| Stability – pH 4 (Day 1 vs 31)        | 7a     | TiO <sub>x</sub> | 1       | 8.01 * 10 <sup>-9</sup>  |
| Stability – pH 4 (Day 1 vs 31)        | 7a     | PANI             | 1       | 9.19 * 10 <sup>-11</sup> |
| Stability – pH 8 (Day 1 vs 31)        | 7b     | TiO <sub>x</sub> | 1       | 1.28 * 10 <sup>-8</sup>  |
| Stability – pH 8 (Day 1 vs 31)        | 7b     | PANI             | 1       | 8.47 * 10 <sup>-7</sup>  |
| Stability – Sensitivity (Day 1 vs 31) | 7c     | TiO <sub>x</sub> | 1       | 4.17 * 10 <sup>-4</sup>  |
| Stability – Sensitivity (Day 1 vs 31) | 7c     | PANI             | 1       | 2.53 * 10 <sup>-4</sup>  |

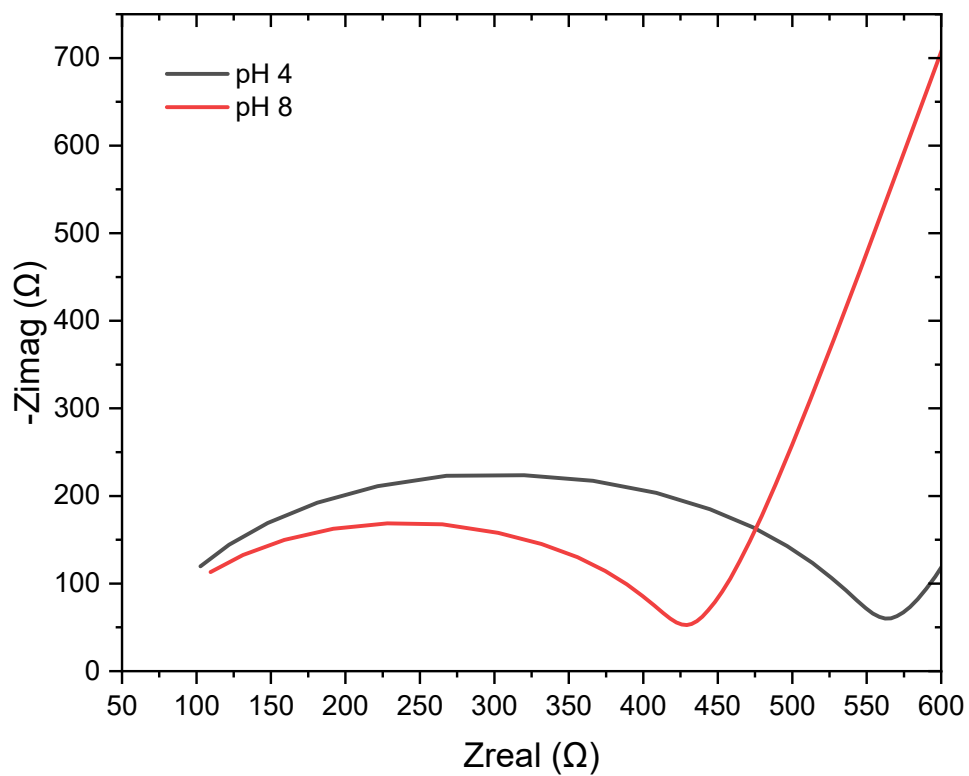

Figure S9. Nyquist plots from the diluted McIlvaine buffer solutions for pH 4 and pH 8. The real axis shift remains the same as the one can be observed from the pristine buffer solution ones (see Figure 9 and S1). This means that the real axis shift can be correlated with the Ag series resistance.

**(a)**

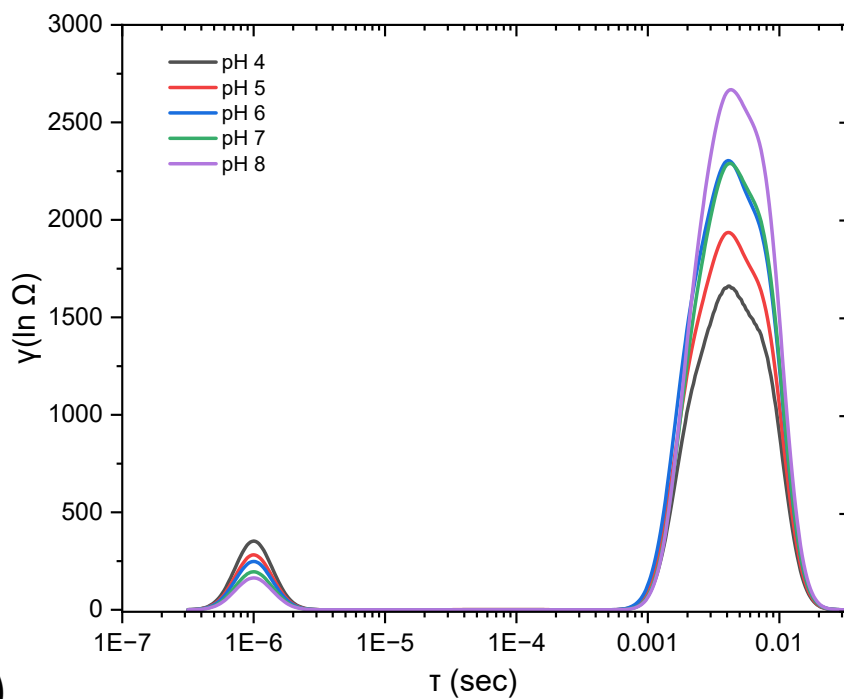

**(b)**

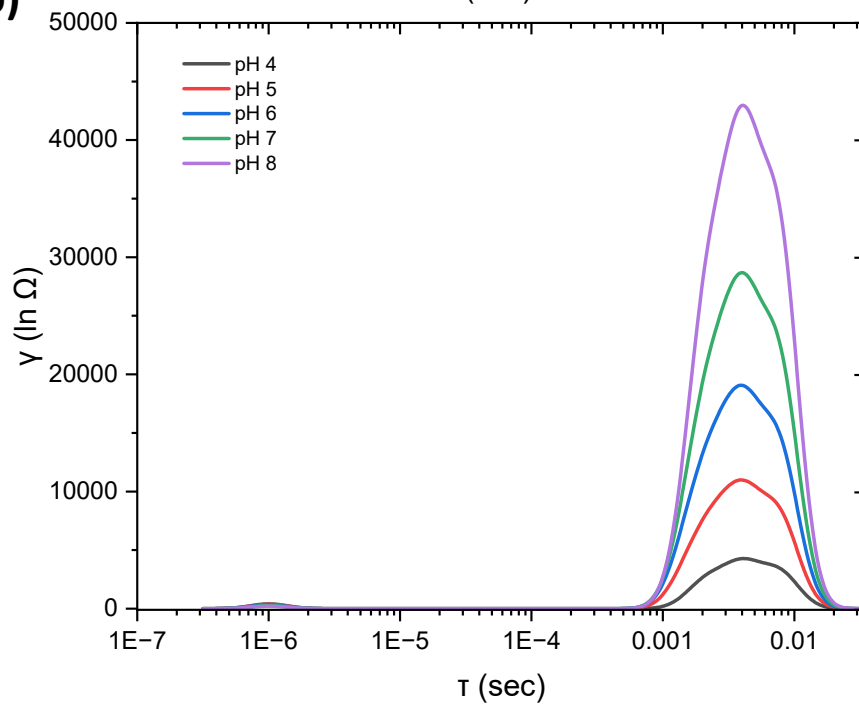

Figure S10. The full spectrum of the DRT data for (a) the  $\text{TiO}_x$  films and (b) the PANI films. In both spectra there are two processes: one fast (around  $10^{-6}$  sec, resistive-capacitive phenomena) and one slow ( $0.005$  sec, ionic phenomena).

## Equivalent Circuit Analysis

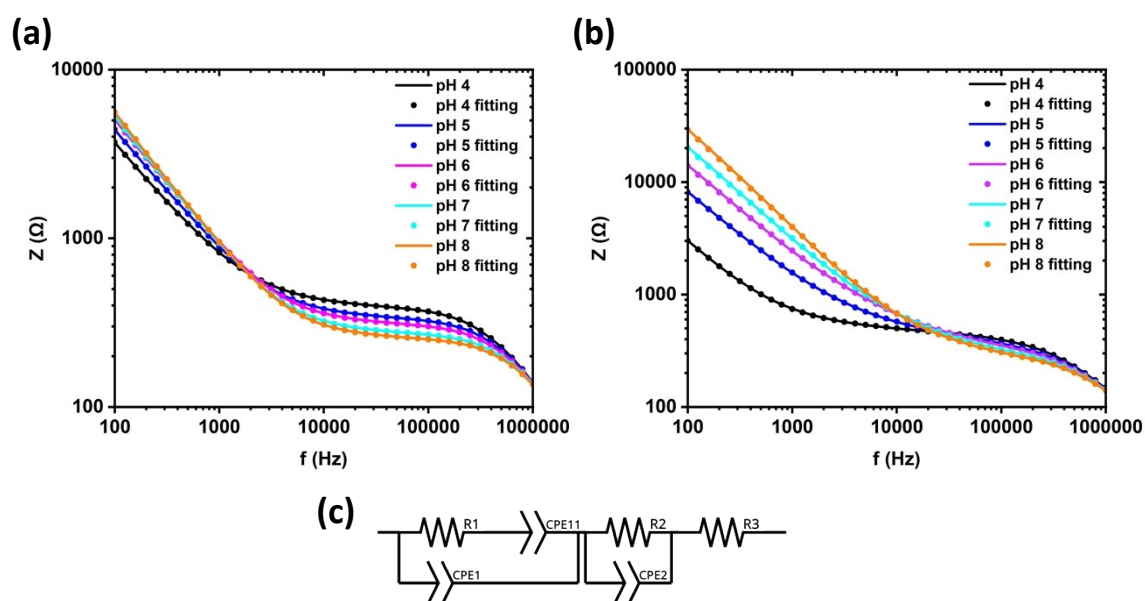

Figure S11. The Bode plots (raw data and equivalent circuit fitting) for (a) TiO<sub>x</sub> and (b) PANI pH sensors, respectively. (c) The equivalent circuit used for the EIS fitting. Two time constants have been derived and can be related to the diffusion and interfacial properties of the TiO<sub>x</sub> and PANI films, as the DRT analysis shows.

### TiO<sub>x</sub> pH sensor

| pH                                     | R <sub>1</sub><br>(Ω) | R <sub>2</sub><br>(Ω)       | R <sub>3</sub><br>(Ω) | CPE <sub>1</sub> (Mag)<br>(nF)        | CPE <sub>1</sub> (n)       |
|----------------------------------------|-----------------------|-----------------------------|-----------------------|---------------------------------------|----------------------------|
| 4                                      | 350.9                 | 1379                        | 32.59                 | 2.8                                   | 0.9448                     |
| 5                                      | 301.1                 | 933.7                       | 33.64                 | 2.57                                  | 0.949                      |
| 6                                      | 275.7                 | 520.7                       | 34.3                  | 2.5                                   | 0.9506                     |
| 7                                      | 239.1                 | 150.8                       | 35.2                  | 2.28                                  | 0.9562                     |
| 8                                      | 217.6                 | 83.05                       | 36.8                  | 1.89                                  | 0.965                      |
| <b>CPE<sub>11</sub> (Mag)<br/>(nF)</b> |                       | <b>CPE<sub>11</sub> (n)</b> |                       | <b>CPE<sub>2</sub> (Mag)<br/>(nF)</b> | <b>CPE<sub>2</sub> (n)</b> |
| 1200                                   |                       | 0.8711                      |                       | 14000                                 | 0.658                      |
| 1100                                   |                       | 0.848                       |                       | 6260                                  | 0.7569                     |
| 1010                                   |                       | 0.8312                      |                       | 4280                                  | 0.846                      |
| 929                                    |                       | 0.829                       |                       | 2110                                  | 0.997                      |
| 851                                    |                       | 0.8325                      |                       | 3040                                  | 1                          |

### PANI pH sensor

| pH                                     | R <sub>1</sub><br>(Ω) | R <sub>2</sub><br>(Ω)       | R <sub>3</sub><br>(Ω) | CPE <sub>1</sub> (Mag)<br>(nF)        | CPE <sub>1</sub> (n)       |
|----------------------------------------|-----------------------|-----------------------------|-----------------------|---------------------------------------|----------------------------|
| 4                                      | 301.1                 | 187.8                       | 42.22                 | 3.46                                  | 0.947                      |
| 5                                      | 220.4                 | 232.2                       | 47.74                 | 2.6                                   | 1                          |
| 6                                      | 245.5                 | 247.7                       | 52.35                 | 2.29                                  | 0.973                      |
| 7                                      | 225.7                 | 114.5                       | 57.02                 | 1.89                                  | 0.984                      |
| 8                                      | 212.9                 | 101.1                       | 59.07                 | 1.58                                  | 1                          |
| <b>CPE<sub>11</sub> (Mag)<br/>(nF)</b> |                       | <b>CPE<sub>11</sub> (n)</b> |                       | <b>CPE<sub>2</sub> (Mag)<br/>(nF)</b> | <b>CPE<sub>2</sub> (n)</b> |
| 1590                                   |                       | 0.839                       |                       | 5510                                  | 0.562                      |

|     |       |      |       |
|-----|-------|------|-------|
| 848 | 0.775 | 4160 | 0.565 |
| 449 | 0.787 | 3180 | 0.638 |
| 257 | 0.815 | 2320 | 0.69  |
| 125 | 0.86  | 1500 | 0.72  |

The transfer function (Laplace domain) of the equivalent impedance can be approximated by the equation below:

$$Z(s) = \frac{as^3 + bs^2 + cs + d}{s(R_1C_1C_{11}s + C_1 + C_{11})(R_2C_2s + 1)}$$

with

$$a = R_1R_2C_{11}R_3C_2$$

$$b = R_1C_{11}R_2(C_1 + C_{11}) + R_3(R_1C_{11} + R_2C_2(C_1 + C_{11}))$$

$$c = R_1C_{11} + R_2C_2(R_1 + R_3)(C_1 + C_{11})$$

$$d = 1$$

Hence, this transfer function has one differentiator and two poles ( $t_1$  and  $t_2$ ). The extracted numerical values of the time constants can be found in the tables below:

| pH value | $t_1$ (sec)      | $t_2$ (sec)      | $t_1$ (sec)      | $t_2$ (sec)      |
|----------|------------------|------------------|------------------|------------------|
|          | TiO <sub>x</sub> |                  | PANI             |                  |
| 4        | $9.83 * 10^{-7}$ | $1.93 * 10^{-2}$ | $1.04 * 10^{-6}$ | $1.04 * 10^{-3}$ |
| 5        | $7.75 * 10^{-7}$ | $5.84 * 10^{-3}$ | $5.73 * 10^{-7}$ | $9.66 * 10^{-4}$ |
| 6        | $6.89 * 10^{-7}$ | $2.23 * 10^{-3}$ | $5.63 * 10^{-7}$ | $7.88 * 10^{-4}$ |
| 7        | $5.45 * 10^{-7}$ | $3.18 * 10^{-4}$ | $4.25 * 10^{-7}$ | $2.65 * 10^{-4}$ |
| 8        | $4.11 * 10^{-7}$ | $2.53 * 10^{-4}$ | $3.36 * 10^{-7}$ | $1.52 * 10^{-4}$ |

Regarding the stability study, the equivalent circuits for the degraded devices can be found below:

TiO<sub>x</sub> pH sensor

| pH – Day                        | R <sub>1</sub><br>(Ω) | R <sub>2</sub><br>(Ω) | R <sub>3</sub><br>(Ω) | CPE <sub>1</sub> (Mag)<br>(nF) | CPE <sub>1</sub> (n) |
|---------------------------------|-----------------------|-----------------------|-----------------------|--------------------------------|----------------------|
| pH 4 – Day 17                   | 356.2                 | 101                   | 62.7                  | 1.55                           | 0.988                |
| pH 4 – Day 31                   | 362.9                 | 99.63                 | 58.3                  | 1.46                           | 0.992                |
| pH 8 – Day 17                   | 225.2                 | 1050                  | 61.01                 | 2.11                           | 0.965                |
| pH 8 – Day 31                   | 232.2                 | 1042                  | 69.01                 | 2.05                           | 0.969                |
| CPE <sub>11</sub> (Mag)<br>(nF) |                       | CPE <sub>11</sub> (n) |                       | CPE <sub>2</sub> (Mag)<br>(nF) | CPE <sub>2</sub> (n) |
| 2613                            |                       | 0.834                 |                       | 20220                          | 0.834                |
| 2643                            |                       | 0.79                  |                       | 21500                          | 0.55                 |
| 960                             |                       | 0.78                  |                       | 15210                          | 0.94                 |
| 972                             |                       | 0.771                 |                       | 15910                          | 0.934                |

PANI pH sensor

| pH – Day                        | R <sub>1</sub><br>(Ω) | R <sub>2</sub><br>(Ω) | R <sub>3</sub><br>(Ω) | CPE <sub>1</sub> (Mag)<br>(nF) | CPE <sub>1</sub> (n) |
|---------------------------------|-----------------------|-----------------------|-----------------------|--------------------------------|----------------------|
| pH 4 – Day 10                   | 328                   | 123.5                 | 62.6                  | 1.653                          | 0.986                |
| pH 4 – Day 31                   | 327                   | 122                   | 63.5                  | 1.64                           | 0.984                |
| pH 8 – Day 10                   | 210.1                 | 281.2                 | 58.17                 | 2.273                          | 0.971                |
| pH 8 – Day 31                   | 208.2                 | 280.4                 | 59.3                  | 2.24                           | 0.968                |
| CPE <sub>11</sub> (Mag)<br>(nF) |                       | CPE <sub>11</sub> (n) |                       | CPE <sub>2</sub> (Mag)<br>(nF) | CPE <sub>2</sub> (n) |
| 244                             |                       | 0.76                  |                       | 4001                           | 1                    |
| 248                             |                       | 0.763                 |                       | 4055                           | 1                    |
| 237                             |                       | 0.822                 |                       | 2700                           | 0.86                 |
| 239                             |                       | 0.827                 |                       | 2720                           | 0.863                |

The extracted numerical values of the time constants can be found in the tables below:

| pH – Day               | t <sub>1</sub> (sec)    | t <sub>2</sub> (sec)   | pH – Day      | t <sub>1</sub> (sec)    | t <sub>2</sub> (sec)    |
|------------------------|-------------------------|------------------------|---------------|-------------------------|-------------------------|
| <b>TiO<sub>x</sub></b> |                         |                        | <b>PANI</b>   |                         |                         |
| pH 4 – Day 17          | 5.52 * 10 <sup>-7</sup> | 2 * 10 <sup>-3</sup>   | pH 4 – Day 10 | 5.42 * 10 <sup>-7</sup> | 4.9 * 10 <sup>-4</sup>  |
| pH 4 – Day 31          | 5.29 * 10 <sup>-7</sup> | 2.1 * 10 <sup>-3</sup> | pH 4 – Day 31 | 5.36 * 10 <sup>-7</sup> | 4.91 * 10 <sup>-4</sup> |
| pH 8 – Day 17          | 4.75 * 10 <sup>-7</sup> | 1.5 * 10 <sup>-2</sup> | pH 8 – Day 10 | 4.77 * 10 <sup>-7</sup> | 7.5 * 10 <sup>-4</sup>  |
| pH 8 – Day 31          | 4.76 * 10 <sup>-7</sup> | 1.6 * 10 <sup>-2</sup> | pH 8 – Day 31 | 4.66 * 10 <sup>-7</sup> | 7.6 * 10 <sup>-4</sup>  |

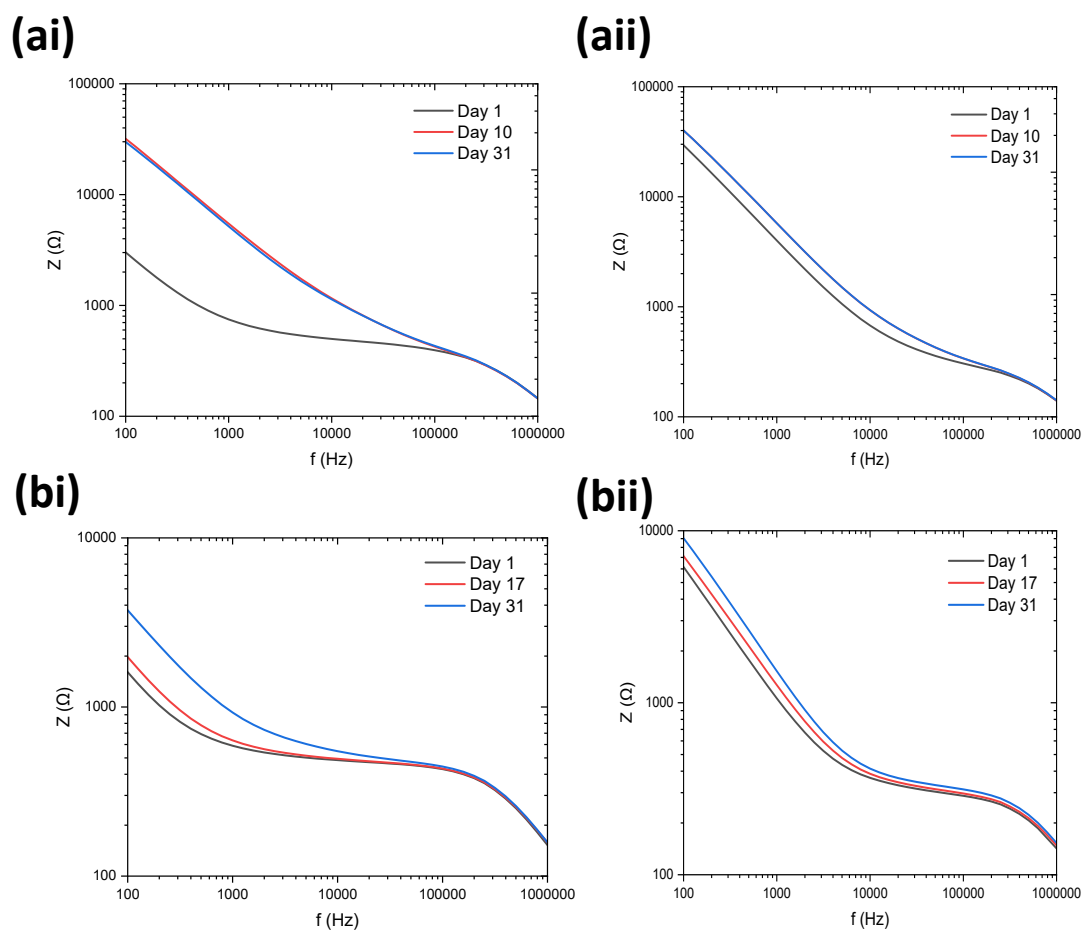

Figure S12. Bode plots for the one-month time stability experiments, for TiO<sub>x</sub> (ai - aii) and PANI (bi - bii). The i and ii notify the pH 4 and pH 8 study, respectively. From the shift at low-frequencies, it can be derived that the diffusion-related phenomena are mostly affected after the 31-day stability experiments.

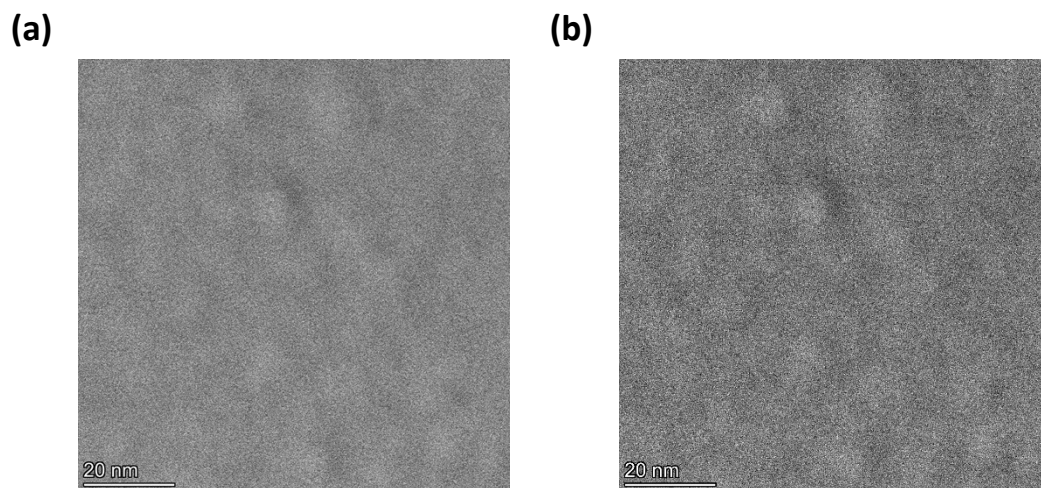

Figure S13. (a) HAADF-STEM image of the  $\text{TiO}_x$  film, (b) DF-STEM image of the  $\text{TiO}_x$  film. The contrast is related to the nanometre level non-uniformities of the film surface.

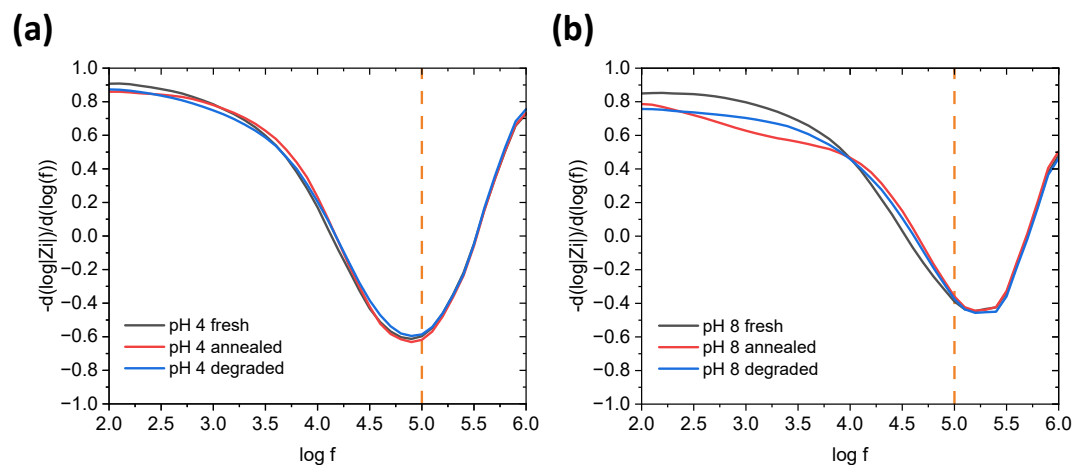

Figure S14. The effective CPE-like phase parameter  $\alpha$  over frequency for (a) pH 4, (b) pH 8, respectively. The frequency of 100 kHz is denoted with the orange dashed line. The changes in the frequency's position, the magnitude of the global minimum and the depth are minimal. Also, the frequency of 100 kHz lies near the global minimum of the spectra, so the slope-based sensitivity is reduced. Hence, at the frequency of 100 kHz, any porosity and/or adsorbed water produce smaller EIS signal variations relative to regions with steeper slopes.

Table S1. A comparison table for the stability of various pH electrochemical biosensors.

| Reference        | Sensing material(s)            | Electrode material | Method                                 | Sensitivity                         | Stability & Protocol                                                                                                           |
|------------------|--------------------------------|--------------------|----------------------------------------|-------------------------------------|--------------------------------------------------------------------------------------------------------------------------------|
| [23]             | PANI-IrO <sub>2</sub> /Nafion  | Au                 | OCP                                    | -69.1 mV/pH                         | 14 days (~1% loss, at pH 7.3 only)                                                                                             |
| [26]             | IrO <sub>2</sub>               | Pt                 | OCP                                    | -77 mV/pH                           | 6 weeks (x8 higher response time, x2 higher at 4 weeks)                                                                        |
| [27]             | IrO <sub>2</sub>               | Au                 | OCP                                    | -74 mV/pH                           | 7 days stability at pH 4, 7 and 9.                                                                                             |
| [36]             | IrO <sub>2</sub>               | Au                 | OCP                                    | -69.43 mV/pH                        | $\Delta E=0.76$ mV/pH after 15 hours, at pH 8.                                                                                 |
| [37]             | PANI/IrO <sub>x</sub>          | Au                 | OCP                                    | -59.1 mV/pH                         | 3.5 mV drift after 30 days (stability in PBS only)                                                                             |
| [38]             | PANI                           | Ag/AgCl            | OCP                                    | -62.4 mV/pH                         | 3 mV/hour for 14 hours (~15% loss)                                                                                             |
| [39]             | TiO <sub>2</sub>               | -                  | OCP                                    | 1.16 dBm/pH                         | 25% loss after 4 days.                                                                                                         |
| [40]             | Al <sub>2</sub> O <sub>3</sub> | Si                 | C-V measurements (flat-band potential) | -56 mV/pH                           | 0.35 mV/day drift, 600 days (pH 7 only, substrate heating at 800°C) Sensitivity almost same.                                   |
| [41]             | IrO <sub>2</sub>               | Pt                 | OCP                                    | -69.89 mV/pH                        | 1 year (sensitivity loss 20% after 30 days)                                                                                    |
| <b>This work</b> | <b>TiO<sub>x</sub></b>         | <b>Ag</b>          | <b>EIS</b>                             | <b>-27.8 <math>\Omega</math>/pH</b> | <b>Stability 31 days.</b><br><b>5.65% increase at pH 4,</b><br><b>3.8% increase at pH 8,</b><br><b>2.25% sensitivity loss.</b> |
